# Supplementary material for: Deep Learning Algorithm for Reducing CT Slice Thickness: Effect on Reproducibility of Radiomic Features in Lung Cancer
Source: PubMed Central journal article supplement — Korean J Radiol. 2019 Aug 27;20(10):1431–40. doi: 10.3348/kjr.2019.0212 (PMC6757001; doi:10.3348/kjr.2019.0212), 2019-08-27
Supplement: kjr-20-1431-s002.pdf [file kjr-20-1431-s002.pdf]

**Supplementary Table 1. Operational Parameters for Training Proposed Convolutional Neural Network**

| Operational Parameters      | Values or Names                  |
|-----------------------------|----------------------------------|
| Number of iteration (epoch) | 40                               |
| Mini-batch sample size      | 32                               |
| Loss function               | L1 loss (sum of absolute values) |
| Optimization method         | ADAM                             |
| Learning rate               | 0.0001                           |

ADAM = adaptive moment estimation
