# Supplementary material for: Deep Learning Algorithm for Reducing CT Slice Thickness: Effect on Reproducibility of Radiomic Features in Lung Cancer
Source: PubMed Central journal article supplement — Korean J Radiol. 2019 Aug 27;20(10):1431–40. doi: 10.3348/kjr.2019.0212 (PMC6757001; doi:10.3348/kjr.2019.0212), 2019-08-27
Supplement: kjr-20-1431-s003.pdf [file kjr-20-1431-s003.pdf]

**Supplementary Table 2. CCCs for Subclass of Wavelet Features**

| Subclass of<br>Wavelet Features | 1 mm vs. 3 mm |      | 1 mm vs. 5 mm |      | 3 mm vs. 5 mm |      |
|---------------------------------|---------------|------|---------------|------|---------------|------|
|                                 | Original      | SR   | Original      | SR   | Original      | SR   |
| LHL                             | 0.38          | 0.82 | 0.24          | 0.60 | 0.67          | 0.80 |
| LHH                             | 0.42          | 0.14 | 0.32          | 0.09 | 0.72          | 0.54 |
| HLL                             | 0.42          | 0.88 | 0.28          | 0.70 | 0.70          | 0.85 |
| LLH                             | 0.31          | 0.40 | 0.16          | 0.26 | 0.53          | 0.70 |
| HLH                             | 0.42          | 0.19 | 0.31          | 0.12 | 0.68          | 0.58 |
| HHH                             | 0.23          | 0.20 | 0.15          | 0.18 | 0.43          | 0.60 |
| HHL                             | 0.26          | 0.71 | 0.16          | 0.46 | 0.55          | 0.73 |
| LLL                             | 0.62          | 0.96 | 0.36          | 0.89 | 0.76          | 0.93 |

CCCs = concordance correlation coefficients, H = high frequency, L = low frequency, SR = super-resolution
