# Supplementary material for: Deep Learning Algorithm for Reducing CT Slice Thickness: Effect on Reproducibility of Radiomic Features in Lung Cancer
Source: PubMed Central journal article supplement — Korean J Radiol. 2019 Aug 27;20(10):1431–40. doi: 10.3348/kjr.2019.0212 (PMC6757001; doi:10.3348/kjr.2019.0212), 2019-08-27
Supplement: kjr-20-1431-s004.pdf [file kjr-20-1431-s004.pdf]

**Supplementary Table 3. CCCs between Different Slice Thicknesses before and after SR Application and after Interpolation Method**

| RF Classes                          | 1 mm vs. 3 mm |             |               | 1 mm vs. 5 mm |             |               | 3 mm vs. 5 mm |             |               |
|-------------------------------------|---------------|-------------|---------------|---------------|-------------|---------------|---------------|-------------|---------------|
|                                     | Original      | SR          | Interpolation | Original      | SR          | Interpolation | Original      | SR          | Interpolation |
| <b>Total</b>                        |               |             |               |               |             |               |               |             |               |
| Tumor intensity                     | 0.75 ± 0.17   | 0.97 ± 0.05 | 0.81 ± 0.17   | 0.60 ± 0.21   | 0.92 ± 0.11 | 0.68 ± 0.22   | 0.90 ± 0.06   | 0.96 ± 0.05 | 0.95 ± 0.03   |
| Texture                             | 0.62 ± 0.19   | 0.84 ± 0.15 | 0.54 ± 0.20   | 0.42 ± 0.18   | 0.72 ± 0.19 | 0.39 ± 0.21   | 0.76 ± 0.16   | 0.88 ± 0.13 | 0.86 ± 0.11   |
| Wavelet                             | 0.38 ± 0.22   | 0.54 ± 0.37 | 0.30 ± 0.31   | 0.25 ± 0.19   | 0.41 ± 0.34 | 0.23 ± 0.28   | 0.63 ± 0.22   | 0.71 ± 0.21 | 0.56 ± 0.32   |
| Tumor intensity + texture + wavelet | 0.41 ± 0.23   | 0.58 ± 0.37 | 0.34 ± 0.32   | 0.27 ± 0.21   | 0.45 ± 0.34 | 0.26 ± 0.29   | 0.65 ± 0.22   | 0.72 ± 0.21 | 0.60 ± 0.32   |
| <b>GGN</b>                          |               |             |               |               |             |               |               |             |               |
| Tumor intensity                     | 0.79 ± 0.17   | 0.97 ± 0.05 | 0.79 ± 0.17   | 0.68 ± 0.19   | 0.89 ± 0.11 | 0.67 ± 0.22   | 0.91 ± 0.17   | 0.93 ± 0.05 | 0.95 ± 0.03   |
| Texture                             | 0.63 ± 0.23   | 0.80 ± 0.20 | 0.47 ± 0.22   | 0.44 ± 0.22   | 0.66 ± 0.21 | 0.34 ± 0.22   | 0.74 ± 0.19   | 0.82 ± 0.17 | 0.84 ± 0.11   |
| Wavelet                             | 0.39 ± 0.23   | 0.54 ± 0.38 | 0.29 ± 0.30   | 0.26 ± 0.21   | 0.40 ± 0.33 | 0.22 ± 0.27   | 0.63 ± 0.22   | 0.67 ± 0.23 | 0.57 ± 0.31   |
| Tumor intensity + texture + wavelet | 0.42 ± 0.25   | 0.56 ± 0.37 | 0.32 ± 0.31   | 0.29 ± 0.22   | 0.44 ± 0.34 | 0.24 ± 0.28   | 0.65 ± 0.22   | 0.69 ± 0.23 | 0.60 ± 0.31   |
| <b>Solid</b>                        |               |             |               |               |             |               |               |             |               |
| Tumor intensity                     | 0.58 ± 0.19   | 0.92 ± 0.19 | 0.73 ± 0.24   | 0.40 ± 0.19   | 0.87 ± 0.22 | 0.57 ± 0.24   | 0.83 ± 0.06   | 0.95 ± 0.09 | 0.92 ± 0.05   |
| Texture                             | 0.51 ± 0.19   | 0.82 ± 0.15 | 0.51 ± 0.23   | 0.31 ± 0.16   | 0.68 ± 0.22 | 0.37 ± 0.24   | 0.71 ± 0.14   | 0.87 ± 0.13 | 0.83 ± 0.14   |
| Wavelet                             | 0.35 ± 0.23   | 0.53 ± 0.36 | 0.29 ± 0.31   | 0.22 ± 0.20   | 0.41 ± 0.34 | 0.22 ± 0.28   | 0.59 ± 0.26   | 0.71 ± 0.23 | 0.55 ± 0.33   |
| Tumor intensity + texture + wavelet | 0.37 ± 0.23   | 0.57 ± 0.36 | 0.32 ± 0.32   | 0.24 ± 0.20   | 0.44 ± 0.34 | 0.25 ± 0.29   | 0.60 ± 0.25   | 0.73 ± 0.23 | 0.58 ± 0.33   |

GGN = ground-glass nodule, RF = radiomic feature
